# Supplementary material
Source: Springer Nature journal article supplement (https://www.springermedizin.de/resource/supplementary/12955_2007_446_MOESM2_ESM.pdf/9560470)

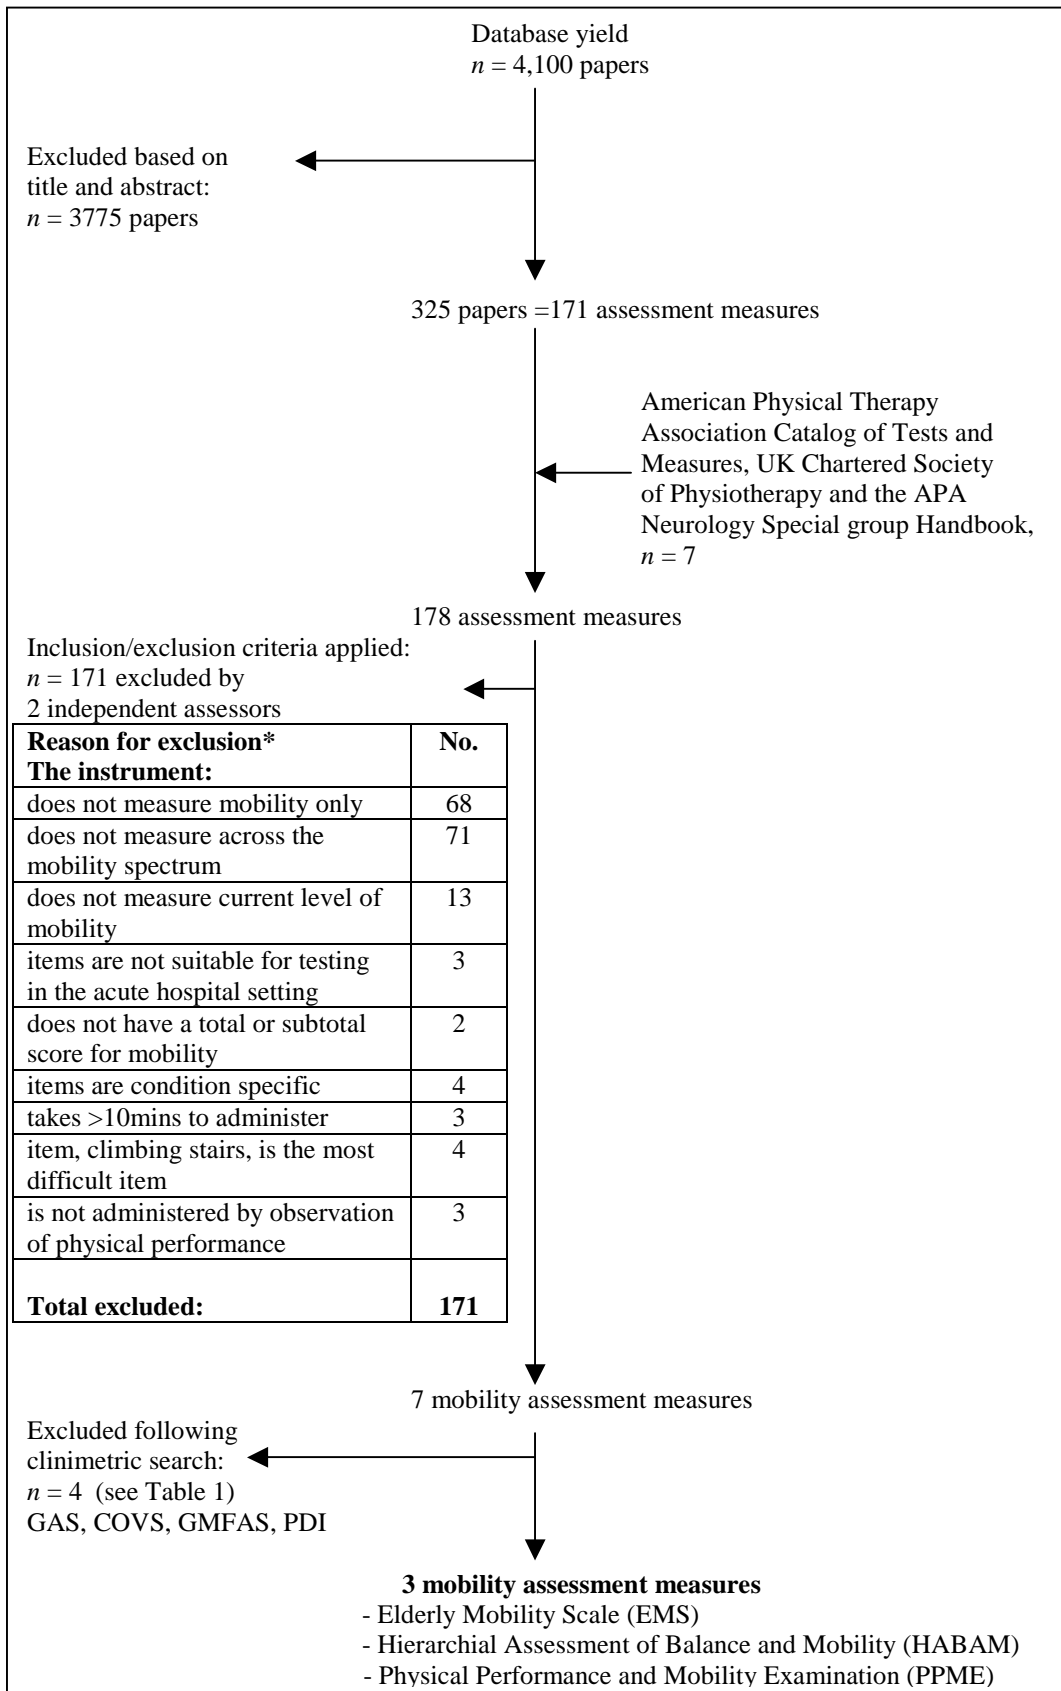

\* many instruments had multiple reasons for exclusion, the first reason identified is reported.

Supplement: MOESM2 [file 9560470]
